# Supplementary material for: Systematic literature review informing the 2022 EULAR recommendations for screening and prophylaxis of chronic and opportunistic infections in adults with autoimmune inflammatory rheumatic diseases
Source: PubMed Central journal article supplement — RMD Open. 2022 Nov 2;8(2):e002726. doi: 10.1136/rmdopen-2022-002726 (PMC9639159; doi:10.1136/rmdopen-2022-002726), 2022-11-02
Supplement: rmdopen-2022-002726supp001.pdf [file rmdopen-2022-002726supp001.pdf]

## **Online supplementary material**

Systematic literature review informing the 2022 EULAR recommendations on the screening and prophylaxis of chronic and opportunistic infections

### **Table of contents**

1. Literature search and screening strategy
2. Flowchart of the systematic literature review (Supplementary Figure-1)
3. Supplementary tables for Tuberculosis
4. Supplementary table for Hepatitis B
5. Supplementary table for *Pneumocystis jirovecii*

## 1. Literature search and screening strategy

### A. Domains of interest

1. Infection
2. Rheumatic Diseases
3. Immunosuppression
4. Screening
5. Prophylaxis

### B. Databases searched

1. PubMed
2. Embase
3. Cochrane

### C. Studies included

Domains (1st AND 2nd AND 3rd) AND (4th OR 5th)

### D. Dates of search

From inception till 5th December 2021

### PubMed

<http://www.ncbi.nlm.nih.gov/pubmed?otool=leiden>

("Infections"[mesh] OR "Bacteria"[mesh] OR "Viruses"[mesh] OR "Parasites"[mesh] OR "Fungi"[mesh] OR "infection"[tw] OR "infections"[tw] OR "Tuberculosis"[tw] OR "hepatitis B"[tw] OR "hepatitis C"[tw] OR "Human immunodeficiency virus"[tw] OR "herpes zoster"[tw] OR "varicella zoster"[tw] OR "HZV"[tw] OR "VZV"[tw] OR "pneumocystis carinii"[tw] OR "pneumocystis jiroveci"[tw] OR "PCP"[tw] OR "human papilloma virus"[tw] OR "HPV"[tw] OR "opportunistic infections"[tw] OR "chronic infections"[tw] OR "Leishmaniasis"[tw] OR "strongyloidiasis"[tw] OR "strongyloides"[tw] OR "histoplasmosis"[tw] OR "histoplasma"[tw] OR "toxoplasmosis"[tw] OR "toxoplasma"[tw] OR "trypanosoma cruzi"[tw] OR "trypanosomiasis"[tw] OR "CMV"[tw] OR "Cytomegalovirus"[tw] OR "Epstein Barr virus"[tw] OR "EBV"[tw] OR "non-tuberculous mycobacteria"[tw] OR "west nile virus"[tw] OR "cryptosporidiosis"[tw] OR "nocardiosis"[tw] OR "nocardia"[tw] OR "actinomycosis"[tw] OR

"actinomyces"[tw] OR "Bartonellosis"[tw] OR "bartonella"[tw] OR "campylobacter"[tw] OR "legionellosis"[tw] OR "leptospirosis"[tw] OR "leptospira"[tw] OR "listeriosis"[tw] OR "listeria"[tw] OR "salmonellosis"[tw] OR "salmonella"[tw] OR "shigellosis"[tw] OR "shigella"[tw] OR "syphilis"[tw] OR "aspergillosis"[tw] OR "Coccidioidomycosis"[tw] OR "candidiasis"[tw] OR "candida"[tw] OR "molds"[tw] OR "leprosy"[tw] OR "Isosporiasis"[tw] OR "isospora"[tw] OR "bacteria"[tw] OR "viruses"[tw] OR "fungi"[tw] OR "parasites"[tw] OR "mycoses"[tw] OR "bacterium"[tw] OR "virus"[tw] OR "fungus"[tw] OR "parasite"[tw] OR "mycosis"[tw] OR "hepatitis E"[tw] OR "chicken pox"[tw] OR "shingles"[tw] OR "Chagas"[tw] OR "legionella"[tw] OR "treponema"[tw] OR "aspergillus"[tw] OR "mycobacterium"[tw] OR "mycobacteria"[tw] OR "JC virus"[tw] OR "ancylostoma"[Mesh] OR "ancylostoma"[tw] OR "ancylostomas"[tw] OR "ancylostomiasis"[Mesh] OR "ancylostomiasis"[tw] OR "ancylostomiasis"[tw] OR "ascariasis"[Mesh] OR "ascariasis"[tw] OR "ascaris"[Mesh] OR "ascaris"[tw] OR "ascari"[tw] OR "chlamydia"[Mesh] OR "chlamydia"[tw] OR "chlamydiae"[tw] OR "chlamydias"[tw] OR "coccidioidal"[tw] OR "coccidioides"[Mesh] OR "coccidioides"[tw] OR "cryptococcosis"[Mesh] OR "cryptococcosis"[tw] OR "cryptococcoses"[tw] OR "cryptococcus"[Mesh] OR "cryptococcus"[tw] OR "cryptosporidium"[Mesh] OR "cryptosporidium"[tw] OR "cyclospora"[Mesh] OR "cyclospora"[tw] OR "cyclosporiasis"[Mesh] OR "cyclosporiasis"[tw] OR "echinococcosis"[Mesh] OR "echinococcosis"[tw] OR "echinococcoses"[tw] OR "echinococcus"[Mesh] OR "echinococcus"[tw] OR "endamoeba"[tw] OR "entamoeba"[Mesh] OR "entamoeba"[tw] OR "entameba"[tw] OR "entamoebas"[tw] OR "entamoebae"[tw] OR "enterobiasis"[Mesh] OR "enterobiasis"[tw] OR "enterobius"[Mesh] OR "enterobius"[tw] OR "enterobius vermicularis"[tw] OR "fasciola"[Mesh] OR "fasciola"[tw] OR "fascioliasis"[Mesh] OR "fascioliasis"[tw] OR "filariasis"[Mesh] OR "filariasis"[tw] OR "filiarises"[tw] OR "Giardia lamblia"[Mesh] OR "Giardia lamblia"[Mesh] OR "neisseria gonorrhoeae"[Mesh] OR "neisseria gonorrhoeae"[tw] OR "gonococcus"[tw] OR "haemophilus influenzae"[tw] OR "haemophilus influenzae"[Mesh] OR "haemophilus influenzae"[tw] OR "hemophilus influenzae"[tw] OR "herpes simplex"[Mesh] OR "herpes simplex"[tw] OR "herpesvirus 8, human"[Mesh] OR "human herpesvirus 8"[tw] OR "hhv8"[tw] OR "hiv"[Mesh] OR "hiv"[tw] OR "ancylostomatoidea"[Mesh] OR "ancylostomatoidea"[tw] OR "hookworm"[tw] OR "hookworms"[tw] OR "HSV"[tw] OR "human t lymphotropic virus 1"[Mesh] OR "human t lymphotropic virus 1"[tw] OR "htlv 1"[tw] OR "deltaretrovirus"[Mesh] OR "deltaretrovirus"[tw] OR "human t lymphotropic virus"[tw] OR "influenza, human"[Mesh] OR "human influenza"[tw] OR "influenza"[tw] OR "influenzae"[tw] OR "influenzas"[tw] OR "giardiasis"[Mesh] OR "giardiasis"[tw] OR "lambliasis"[tw] OR "leishmania"[Mesh] OR "leishmania"[tw] OR "leishmaniasis"[tw] OR "leishmaniae"[tw] OR "loa"[Mesh] OR "loa"[tw] OR "loa loa"[tw] OR "mucormycosis"[Mesh] OR "mucormycosis"[tw] OR "mucormycoses"[tw] OR "neisseria"[Mesh] OR "neisseria"[tw] OR "neisseriae"[tw] OR "neisserias"[tw] OR "nontuberculous mycobacteria"[Mesh] OR "nontuberculous mycobacteria"[tw] OR "non tuberculous mycobacteria"[tw] OR "onchocerca"[Mesh] OR "onchocerca"[tw] OR "onchocerciasis"[Mesh] OR "onchocerciasis"[tw] OR "onchocerciasis"[tw] OR "paracoccidioides"[Mesh] OR "paracoccidioides"[tw] OR "paragonimiasis"[Mesh] OR "paragonimiasis"[tw] OR "paragonimiasis"[tw] OR "paragonimus"[Mesh] OR "paragonimus"[tw] OR "parvovirus b19, human"[Mesh] OR "human parvovirus b19"[tw] OR "parvovirus b19"[tw] OR "streptococcus pneumoniae"[Mesh] OR "streptococcus pneumoniae"[tw] OR "pneumococcus"[tw] OR

"schistosoma"[Mesh] OR "schistosoma"[tw] OR "schistosomas"[tw] OR "schistosomiasis"[Mesh] OR "schistosomiasis"[tw] OR "schistosomiasis"[tw] OR "strongyloidiasis"[Mesh] OR "strongyloidiasis"[tw] OR "strongyloidosis"[tw] OR "taenia"[Mesh] OR "taenia"[tw] OR "taenias"[tw] OR "tenia"[tw] OR "teniae"[tw] OR "taeniasis"[Mesh] OR "taeniasis"[tw] OR "taeniasis"[tw] OR "teniasis"[tw] OR "talaromyces"[Mesh] OR "talaromyces"[tw] OR "talaromyce"[tw] OR "talaromycosis"[Supplementary Concept] OR "talaromycosis"[tw] OR "toxocara"[Mesh] OR "toxocara"[tw] OR "toxocaras"[tw] OR "toxocariasis"[Mesh] OR "toxocariasis"[tw] OR "toxocariases"[tw] OR "trichinella spiralis"[Mesh] OR "trichinella spiralis"[tw] OR "trichinellosis"[Mesh] OR "trichinellosis"[tw] OR "trichinelloses"[tw] OR "trichuris"[Mesh] OR "trichuris"[tw] OR "trichuri"[tw] OR "trypanosoma"[Mesh] OR "trypanosoma"[tw] OR "trypanosomas"[tw] OR "trichuris"[Mesh] OR "trichuris"[tw] OR "whipworm"[tw] OR "trichuriasis"[Mesh] OR "trichuriasis"[tw] OR "whipworms"[tw] OR "wuchereria bancrofti"[Mesh] OR "wuchereria bancrofti"[tw]) AND ("rheumatology"[majr] OR "rheumatic diseases"[majr] OR "musculoskeletal diseases"[majr] OR "lupus erythematosus, systemic"[majr] OR "antiphospholipid syndrome"[majr] OR "sjogren's syndrome"[majr] OR "arthritis, rheumatoid"[majr] OR "arthritis, psoriatic"[majr] OR "spondylarthropathies"[majr] OR "Behcet syndrome"[majr] OR "vasculitis"[majr] OR "takayasu arteritis"[majr] OR "giant cell arteritis"[majr] OR "polyarteritis nodosa"[majr] OR "scleroderma, systemic"[majr] OR "dermatomyositis"[majr] OR "immunoglobulin g4-related disease"[majr] OR "polychondritis, relapsing"[majr] OR "familial mediterranean fever"[majr] OR "arthritis, juvenile"[majr] OR "ANCA-vasculitis"[ti] OR "antiphospholipid syndrome"[ti] OR "anti-phospholipid syndrome"[ti] OR "arthritis"[ti] OR "arthritis"[ti] OR "Autoimmune rheumatic disease"[ti] OR "Autoimmune rheumatic diseases"[ti] OR "autoinflammatory disease"[ti] OR "autoinflammatory diseases"[ti] OR "Behcet syndrome"[ti] OR "Behcet's disease"[ti] OR "cryoglobulinemic vasculitis"[ti] OR "dermatomyositis"[ti] OR "familial Mediterranean fever"[ti] OR "giant cell arteritis"[ti] OR "IgG4-related disease"[ti] OR "immunoglobulin g4-related disease"[ti] OR "inflammatory myopathy"[ti] OR "lupus"[ti] OR "musculoskeletal disease"[ti] OR "musculoskeletal diseases"[ti] OR "polyarteritis nodosa"[ti] OR "psoriatic arthritis"[ti] OR "relapsing polychondritis"[ti] OR "relapsing polychondritis"[ti] OR "rheumatic disease"[ti] OR "rheumatic diseases"[ti] OR "Rheumatic musculoskeletal disease"[ti] OR "Rheumatic musculoskeletal diseases"[ti] OR "rheumatica polymyalgia"[ti] OR "rheumatoid"[ti] OR "rheumatoid arthritis"[ti] OR "Rheumatology"[ti] OR "seronegative spondyloarthropathies"[ti] OR "seronegative spondyloarthropathy"[ti] OR "sjogren syndrome"[ti] OR "Sjogren's syndrome"[ti] OR "sjogrens syndrome"[ti] OR "spondylarthropathies"[ti] OR "spondylarthropathy"[ti] OR "still's disease"[ti] OR "still disease"[ti] OR "Systemic lupus erythematosus"[ti] OR "systemic lupus"[ti] OR "SLE"[ti] OR "systemic scleroderma "[ti] OR "systemic sclerosis"[ti] OR "Takayasu arteritis"[ti] OR "vasculitis"[ti] OR "spondylitis, ankylosing"[majr] OR "ankylosing spondylitis"[ti] OR "cutaneous limited sclerosis"[ti] OR "cutaneous sclerosis"[ti] OR "inflammatory myopathy"[ti] OR "scleroderma, limited"[majr] OR "limited scleroderma"[ti] OR "limited sclerosis"[ti] OR "Myositis"[majr] OR "Myositis"[ti] OR "Dermatomyositis"[ti] OR "Pyomyositis"[ti] OR "Scleroderma, Systemic"[majr] OR "Scleroderma"[ti] OR "Systemic Sclerosis"[ti]) AND ("steroids"[mesh] OR "adrenal cortex hormones"[mesh] OR "glucocorticoids"[Pharmacological Action] OR "glucocorticoids"[mesh] OR "prednisolone"[mesh] OR "prednisone"[mesh] OR "methylprednisolone"[mesh] OR "cortisone"[mesh] OR "methotrexate"[mesh] OR

"leflunomide"[mesh] OR "sulfasalazine"[mesh] OR "cyclophosphamide"[mesh] OR "tofacitinib"[Supplementary Concept] OR "baricitinib"[Supplementary Concept] OR "janus kinase inhibitors"[Pharmacological Action] OR "infliximab"[mesh] OR "etanercept"[mesh] OR "adalimumab"[mesh] OR "golimumab"[Supplementary Concept] OR "certolizumab pegol"[mesh] OR "abatacept"[mesh] OR "tocilizumab"[Supplementary Concept] OR "sarilumab"[Supplementary Concept] OR "ustekinumab"[mesh] OR "secukinumab"[Supplementary Concept] OR "ixekizumab"[Supplementary Concept] OR "canakinumab"[Supplementary Concept] OR "interleukin 1 receptor antagonist protein"[mesh] OR "rilonacept"[Supplementary Concept] OR "rituximab"[mesh] OR "belimumab"[Supplementary Concept] OR "guselkumab"[Supplementary Concept] OR "Antirheumatic Agents"[Mesh] OR "Antirheumatic Agents" [Pharmacological Action] OR "abatacept"[tw] OR "adalimumab"[tw] OR "adrenal cortex hormone"[tw] OR "adrenal cortex hormones"[tw] OR "anakinra"[tw] OR "baricitinib"[tw] OR "belimumab"[tw] OR "biologic DMARD"[tw] OR "biologic DMARDs"[tw] OR "biological DMARD"[tw] OR "biological DMARDs"[tw] OR "canakinumab"[tw] OR "certolizumab"[tw] OR "corticosteroid"[tw] OR "corticosteroids"[tw] OR "cortisone"[tw] OR "cyclophosphamide"[tw] OR "disease modifying anti-rheumatic"[tw] OR "disease modifying anti-rheumatic drugs"[tw] OR "DMARD"[tw] OR "DMARDs"[tw] OR "etanercept"[tw] OR "glucocorticoid"[tw] OR "glucocorticoids"[tw] OR "glucocorticosteroid"[tw] OR "glucocorticosteroids"[tw] OR "golimumab"[tw] OR "guselkumab"[tw] OR "infliximab"[tw] OR "interleukin 1 receptor antagonist"[tw] OR "interleukin 1 receptor antagonists"[tw] OR "ixekizumab"[tw] OR "JAK-inhibitor"[tw] OR "JAK-inhibitors"[tw] OR "janus kinase inhibitor"[tw] OR "janus kinase inhibitors"[tw] OR "leflunomide"[tw] OR "methotrexate"[tw] OR "methylprednisolone"[tw] OR "mycophenolate"[tw] OR "prednisolone"[tw] OR "prednisone"[tw] OR "rilonacept"[tw] OR "rituximab"[tw] OR "sarilumab"[tw] OR "secukinumab"[tw] OR "steroid"[tw] OR "steroids"[tw] OR "sulfasalazine"[tw] OR "tocilizumab"[tw] OR "tofacitinib"[tw] OR "ustekinumab"[tw] OR "immunosuppres\*" [tw] OR "immuno suppres\*" [tw] OR "immune suppres\*" [tw] OR "Immunosuppressive Agents"[Pharmacological Action] OR "Immunosuppressive Agents"[Mesh] OR "Immunosuppression"[Mesh] OR "tofacitinib"[Supplementary Concept] OR "tofacitinib"[tw] OR "baricitinib"[Supplementary Concept] OR "baricitinib"[tw] OR "upadacitinib"[Supplementary Concept] OR "upadacitinib"[tw] OR "upadacitinib"[Supplementary Concept] OR "upadacitinib"[tw] OR "Rinvoq"[tw]) AND ("mass screening"[mesh] OR "tuberculin test"[mesh] OR "interferon-gamma release tests"[mesh] OR "Mass Chest X-Ray"[Mesh] OR "enzyme-linked immunospot assay"[mesh] OR "hepatitis b surface antigens"[mesh] OR "anti-HBc"[tw] OR "anti-HBV"[tw] OR "anti-HCV"[tw] OR "anti-HIV"[tw] OR "antiHBc"[tw] OR "antiHBV"[tw] OR "antiHCV"[tw] OR "antiHIV"[tw] OR "chest-X-ray"[tw] OR "elispot"[tw] OR "HBsAg"[tw] OR "HBV-DNA"[tw] OR "IGRA"[tw] OR "Mantoux"[tw] OR "quantiferon"[tw] OR "screening"[tw] OR "tuberculin skin test"[tw] OR "tuberculin skin tests"[tw] OR "HBc"[tw] OR "HBV"[tw] OR "HCV"[tw] OR "HIV"[tw] OR "T Spot"[tw] OR "varicella serology"[tw] OR "anti-VZV"[tw] OR "VZV"[tw] OR "varicella zoster virus"[tw] OR "chicken pox"[tw] OR "shingles"[tw] OR "anti-VZV"[tw] OR "chickenpox"[Mesh] OR "chickenpox"[tw] OR "chicken pox"[tw] OR "HBc"[tw] OR "HBV"[tw] OR "HCV"[tw] OR "hiv"[Mesh] OR "hiv"[tw] OR "herpes zoster"[Mesh] OR "herpes zoster"[tw] OR "shingles"[tw] OR "shingle"[tw] OR "herpesvirus 3, human"[Mesh] OR "human herpesvirus 3"[tw] OR "varicella zoster virus"[tw] OR "T Spot"[tw] OR "TSpot"[tw] OR

"varicella"[tw] OR "prevention and control"[Subheading] OR "Preventive Health Services"[Mesh:NoExp] OR "Primary Prevention"[mesh] OR "Secondary Prevention"[mesh] OR "Tertiary Prevention"[mesh] OR "Pre-Exposure Prophylaxis"[Mesh] OR "Post-Exposure Prophylaxis"[Mesh] OR "Antibiotic Prophylaxis"[Mesh] OR "rifampin"[mesh] OR "rifapentine"[Supplementary Concept] OR "itraconazole"[mesh] OR "fluconazole"[mesh] OR "azithromycin"[mesh] OR "clarithromycin"[mesh] OR "varicella-zoster immune globulin"[Supplementary Concept] OR "entecavir"[Supplementary Concept] OR "tenofovir"[mesh] OR "lamivudine"[mesh] OR "acyclovir"[mesh] OR "pentamidine"[mesh] OR "valganciclovir"[mesh] OR "acyclovir"[tw] OR "Azithromycin"[tw] OR "chemoprophylaxis"[tw] OR "chemoprophyl\*" [tw] OR "Clarithromycin"[tw] OR "entecavir"[tw] OR "fluconazole"[tw] OR "isoniazide"[tw] OR "Itraconazole"[tw] OR "lamivudine"[tw] OR "pentamidine"[tw] OR "prevent\*" [tw] OR "prophylaxis"[tw] OR "prophyla\*" [tw] OR "rifampicin"[tw] OR "rifampin"[tw] OR "rifapentine"[tw] OR "sulfomethoxazole"[tw] OR "tenofovir"[tw] OR "trimethoprim"[tw] OR "valganciclovir"[tw] OR "Varicella-zoster immune globulin\*" [tw] OR "septrim"[tw] OR "co trimoxazole"[tw] OR "valacyclovir"[mesh] OR "valacyclovir"[tw] OR "valaciclovir"[tw] OR "Trimethoprim, Sulfamethoxazole Drug Combination"[Mesh] OR "Centrin"[tw] OR "Cotrimoxazole"[tw] OR "Eslectin"[tw] OR "Insozalin"[tw] OR "TMP-SMX"[tw] OR "Trimethoprim Sulfamethoxazole"[tw] OR "Sulfamethoxazole Trimethoprim"[tw] OR "Trimezole"[tw] OR "Co Trimoxazole"[tw] OR "TMP SMX"[tw] OR "Centran"[tw] OR "Trimedim"[tw] OR "Septrin"[tw] OR "Trimethoprimsulfa"[tw] OR "Bactifor"[tw] OR "Sumetrolim"[tw] OR "Abactrim"[tw] OR "Bactrim"[tw] OR "Biseptol"[tw] OR "Biseptol 480"[tw] OR "Biseptol480"[tw] OR "Drylin"[tw] OR "Eusaprim"[tw] OR "Kepinol"[tw] OR "Kepinol Forte"[tw] OR "Lescot"[tw] OR "Metomide"[tw] OR "Oripriam"[tw] OR "Septra"[tw] OR "Sulprim"[tw] OR "Trimosulfa"[tw] OR "Valacyclovir"[Mesh] OR "Valacyclovir"[tw] OR "Valaciclovir"[tw])) AND english[la] NOT (("Case Reports"[ptyp] OR "case report"[ti]) NOT ("Review"[ptyp] OR "review"[ti] OR "Clinical Study"[ptyp] OR "trial"[ti] OR "RCT"[ti])) NOT ("Animals"[mesh] NOT "Humans"[mesh])

### Embase (OVID version)

<http://ovidsp.ovid.com/ovidweb.cgi?T=JS&PAGE=main&MODE=ovid&D=oemezd>

((exp \*"Infection"/ OR exp \*"Bacterium"/ OR exp \*"Virus"/ OR exp \*"Parasite"/ OR exp \*"Fungus"/ OR "infection".ti,ab OR "infections".ti,ab OR "Tuberculosis".ti,ab OR "hepatitis B".ti,ab OR "hepatitis C".ti,ab OR "Human immunodeficiency virus".ti,ab OR "herpes zoster".ti,ab OR "varicella zoster".ti,ab OR "HZV".ti,ab OR "VZV".ti,ab OR "pneumocystis carinii".ti,ab OR "pneumocystis jiroveci".ti,ab OR "PCP".ti,ab OR "human papilloma virus".ti,ab OR "HPV".ti,ab OR "opportunistic infections".ti,ab OR "chronic infections".ti,ab OR "Leishmaniasis".ti,ab OR "strongyloidiasis".ti,ab OR "strongyloides".ti,ab OR "histoplasmosis".ti,ab OR "histoplasma".ti,ab OR "toxoplasmosis".ti,ab OR "toxoplasma".ti,ab OR "trypanosoma cruzi".ti,ab OR "trypanosomiasis".ti,ab OR "CMV".ti,ab OR

"Cytomegalovirus".ti,ab OR "Epstein Barr virus".ti,ab OR "EBV".ti,ab OR "non-tuberculous mycobacteria".ti,ab OR "west nile virus".ti,ab OR "cryptosporidiosis".ti,ab OR "nocardiosis".ti,ab OR "nocardia".ti,ab OR "actinomycosis".ti,ab OR "actinomyces".ti,ab OR "Bartonellosis".ti,ab OR "bartonella".ti,ab OR "campylobacter".ti,ab OR "legionellosis".ti,ab OR "leptospirosis".ti,ab OR "leptospira".ti,ab OR "listeriosis".ti,ab OR "listeria".ti,ab OR "salmonellosis".ti,ab OR "salmonella".ti,ab OR "shigellosis".ti,ab OR "shigella".ti,ab OR "syphilis".ti,ab OR "aspergillosis".ti,ab OR "Coccidioidomycosis".ti,ab OR "candidiasis".ti,ab OR "candida".ti,ab OR "molds".ti,ab OR "leprosy".ti,ab OR "Isosporiasis".ti,ab OR "isospora".ti,ab OR "bacteria".ti,ab OR "viruses".ti,ab OR "fungi".ti,ab OR "parasites".ti,ab OR "mycoses".ti,ab OR "bacterium".ti,ab OR "virus".ti,ab OR "fungus".ti,ab OR "parasite".ti,ab OR "mycosis".ti,ab OR "hepatitis E".ti,ab OR "chicken pox".ti,ab OR "shingles".ti,ab OR "Chagas".ti,ab OR "legionella".ti,ab OR "treponema".ti,ab OR "aspergillus".ti,ab OR "mycobacterium".ti,ab OR "mycobacteria".ti,ab OR "JC virus".ti,ab OR exp \*"ancylostoma"/ OR "ancylostoma".ti,ab OR "ancylostomas".ti,ab OR exp \*"ancylostomiasis"/ OR "ancylostomiasis".ti,ab OR "ancylostomiasis".ti,ab OR exp \*"ascariasis"/ OR "ascariasis".ti,ab OR exp \*"ascaris"/ OR "ascaris".ti,ab OR "ascari".ti,ab OR \* exp \*"chlamydia"/ OR "chlamydia".ti,ab OR "chlamydiae".ti,ab OR "chlamydias".ti,ab OR "coccidioidal".ti,ab OR exp \*"coccidioides"/ OR "coccidioides".ti,ab OR exp \*"cryptococcosis"/ OR "cryptococcosis".ti,ab OR "cryptococcoses".ti,ab OR exp \*"cryptococcus"/ OR "cryptococcus".ti,ab OR exp \*"cryptosporidium"/ OR "cryptosporidium".ti,ab OR exp \*"cyclospora"/ OR "cyclospora".ti,ab OR exp \*"cyclosporiasis"/ OR "cyclosporiasis".ti,ab OR exp \*"echinococcosis"/ OR "echinococcosis".ti,ab OR "echinococcoses".ti,ab OR exp \*"echinococcus"/ OR "echinococcus".ti,ab OR "endamoeba".ti,ab OR exp \*"entamoeba"/ OR "entamoeba".ti,ab OR "entameba".ti,ab OR "entamoebas".ti,ab OR "entamoebae".ti,ab OR exp \*"enterobiasis"/ OR "enterobiasis".ti,ab OR exp \*"enterobius"/ OR "enterobius".ti,ab OR "enterobius vermicularis".ti,ab OR exp \*"fasciola"/ OR "fasciola".ti,ab OR exp \*"fascioliasis"/ OR "fascioliasis".ti,ab OR exp \*"filariasis"/ OR "filariasis".ti,ab OR "filariases".ti,ab OR exp \*"Giardia lamblia"/ OR exp \*"neisseria gonorrhoeae"/ OR "neisseria gonorrhoeae".ti,ab OR "gonococcus".ti,ab OR "haemophilus influenzae".ti,ab OR exp \*"haemophilus influenzae"/ OR "haemophilus influenzae".ti,ab OR "hemophilus influenzae".ti,ab OR exp \*"herpes simplex"/ OR "herpes simplex".ti,ab OR exp \*"herpesvirus 8, human"/ OR exp \*"Human herpesvirus 8"/ OR "human herpesvirus 8".ti,ab OR "hhv8".ti,ab OR exp \*"hiv"/ OR "hiv".ti,ab OR exp \*"ancylostomatoidea"/ OR "ancylostomatoidea".ti,ab OR "hookworm".ti,ab OR "hookworms".ti,ab OR "HSV".ti,ab OR exp \*"human t lymphotropic virus 1"/ OR "human t lymphotropic virus 1".ti,ab OR "htlv 1".ti,ab OR exp \*"deltaretrovirus"/ OR "deltaretrovirus".ti,ab OR "human t lymphotropic virus".ti,ab OR exp \*"influenza, human"/ OR exp \*"Influenza virus"/ OR exp \*"influenza"/ OR "human influenza".ti,ab OR "influenza".ti,ab OR "influenzae".ti,ab OR "influenzas".ti,ab OR exp \*"giardiasis"/ OR "giardiasis".ti,ab OR "lambliasis".ti,ab OR exp \*"leishmania"/ OR "leishmania".ti,ab OR "leishmanias".ti,ab OR "leishmaniae".ti,ab OR exp \*"loa"/ OR "loa".ti,ab OR "loa loa".ti,ab OR exp \*"mucormycosis"/ OR "mucormycosis".ti,ab OR "mucormycoses".ti,ab OR exp \*"neisseria"/ OR "neisseria".ti,ab OR "neisseriae".ti,ab OR "neisserias".ti,ab OR exp \*"nontuberculous mycobacteria"/ OR "nontuberculous mycobacteria".ti,ab OR "non tuberculous mycobacteria".ti,ab OR exp \*"onchocerca"/ OR "onchocerca".ti,ab OR exp \*"onchocerciasis"/ OR "onchocerciasis".ti,ab OR "onchocerciasis".ti,ab OR exp \*"paracoccidioides"/ OR "paracoccidioides".ti,ab OR

"paragonimiasis"/ OR "paragonimiasis".ti,ab OR "paragonimiasis".ti,ab OR exp  
\*"paragonimus"/ OR "paragonimus".ti,ab OR exp \*"parvovirus b19, human"/ OR exp \*"Human  
parvovirus B19"/ OR "human parvovirus b19".ti,ab OR "parvovirus b19".ti,ab OR exp  
\*"streptococcus pneumoniae"/ OR "streptococcus pneumoniae".ti,ab OR "pneumococcus".ti,ab  
OR exp \*"schistosoma"/ OR "schistosoma".ti,ab OR "schistosomas".ti,ab OR exp  
\*"schistosomiasis"/ OR "schistosomiasis".ti,ab OR "schistosomiasis".ti,ab OR exp  
\*"strongyloidiasis"/ OR "strongyloidiasis".ti,ab OR "strongyloidosis".ti,ab OR exp \*"taenia"/ OR  
"taenia".ti,ab OR "taenias".ti,ab OR "tenia".ti,ab OR "teniae".ti,ab OR exp \*"taeniasis"/ OR  
"taeniasis".ti,ab OR "taeniasis".ti,ab OR "teniasis".ti,ab OR exp \*"talaromyces"/ OR  
"talaromyces".ti,ab OR "talaromyce".ti,ab OR "talaromyces".ti,ab OR exp \*"toxocara"/ OR  
"toxocara".ti,ab OR "toxocarum".ti,ab OR exp \*"toxocariasis"/ OR "toxocariasis".ti,ab OR  
"toxocariases".ti,ab OR exp \*"trichinella spiralis"/ OR "trichinella spiralis".ti,ab OR exp  
\*"trichinellosis"/ OR "trichinellosis".ti,ab OR "trichinelloses".ti,ab OR exp \*"trichuris"/ OR  
"trichuris".ti,ab OR "trichuri".ti,ab OR exp \*"trypanosoma"/ OR "trypanosoma".ti,ab OR  
"trypanosomas".ti,ab OR exp \*"trichuris"/ OR "trichuris".ti,ab OR "whipworm".ti,ab OR exp  
\*"trichuriasis"/ OR "trichuriasis".ti,ab OR "whipworms".ti,ab OR exp \*"wuchereria bancrofti"/  
OR "wuchereria bancrofti".ti,ab) AND (exp \*"rheumatology"/ OR exp \*"rheumatic disease"/ OR  
exp \*"musculoskeletal disease"/ OR exp \*"systemic lupus erythematosus"/ OR exp  
\*"antiphospholipid syndrome"/ OR exp \*"sjogren syndrome"/ OR exp \*"rheumatoid arthritis"/  
OR exp \*"psoriatic arthritis"/ OR exp \*"spondylarthropathy"/ OR exp \*"behcet disease"/ OR  
exp \*"vasculitis"/ OR exp \*"takayasu arteritis"/ OR exp \*"giant cell arteritis"/ OR exp  
\*"polyarteritis nodosa"/ OR exp \*"systemic sclerosis"/ OR exp \*"dermatomyositis"/ OR exp  
\*"immunoglobulin g4-related disease"/ OR exp \*"relapsing polychondritis"/ OR exp \*"familial  
mediterranean fever"/ OR exp \*"juvenile arthritis"/ OR "ANCA-vasculitis".ti OR  
"antiphospholipid syndrome".ti OR "anti-phospholipid syndrome".ti OR "arthritic".ti OR  
"arthritis".ti OR "Autoimmune rheumatic disease".ti OR "Autoimmune rheumatic diseases".ti  
OR "autoinflammatory disease".ti OR "autoinflammatory diseases".ti OR "behcet syndrome".ti  
OR "Behcet's disease".ti OR "cryoglobulinemic vasculitis".ti OR "dermatomyositis".ti OR  
"familial Mediterranean fever".ti OR "giant cell arteritis".ti OR "IgG4-related disease".ti OR  
"immunoglobulin g4-related disease".ti OR "inflammatory myopathy".ti OR "lupus".ti OR  
"musculoskeletal disease".ti OR "musculoskeletal diseases".ti OR "polyarteritis nodosa".ti OR  
"psoriatic arthritis".ti OR "relapsing polychondritis".ti OR "relapsing polychondritis".ti OR  
"rheumatic disease".ti OR "rheumatic diseases".ti OR "Rheumatic musculoskeletal disease".ti  
OR "Rheumatic musculoskeletal diseases".ti OR "rheumatica polymyalgia".ti OR "rheumatoid".ti  
OR "rheumatoid arthritis".ti OR "Rheumatology".ti OR "seronegative spondyloarthropathies".ti  
OR "seronegative spondyloarthropathy".ti OR "sjogren syndrome".ti OR "Sjogren's syndrome".ti  
OR "sjogrens syndrome".ti OR "spondylarthropathies".ti OR "spondylarthropathy".ti OR "still's  
disease".ti OR "stills disease".ti OR "Systemic lupus erythematosus".ti OR "systemic lupus".ti OR  
"SLE".ti OR "systemic scleroderma".ti OR "systemic sclerosis".ti OR "Takayasu arteritis".ti OR  
"vasculitis".ti OR \*"ankylosing spondylitis"/ OR \*"spondylitis, ankylosing"/ OR "ankylosing  
spondylitis".ti OR "cutaneous limited sclerosis".ti OR "cutaneous sclerosis".ti OR "inflammatory  
myopathy".ti OR \*"scleroderma, limited"/ OR "limited scleroderma".ti OR "limited sclerosis".ti  
OR exp \*"Myositis"/ OR "Myositis".ti OR "Dermatomyositis".ti OR "Pyomyositis".ti OR exp  
\*"Scleroderma"/ OR exp \*"Scleroderma, Systemic"/ OR "Scleroderma".ti OR "Systemic



Sclerosis".ti) AND (exp \*"steroid"/ OR exp \*"corticosteroid"/ OR exp \*"glucocorticoid"/ OR exp \*"prednisolone"/ OR exp \*"prednisone"/ OR exp \*"methylprednisolone"/ OR exp \*"cortisone"/ OR "methotrexate"/ OR exp \*"leflunomide"/ OR exp \*"sulfasalazine"/ OR exp \*"cyclophosphamide"/ OR exp \*"tofacitinib"/ OR exp \*"baricitinib"/ OR exp \*"janus kinase inhibitor"/ OR exp \*"infliximab"/ OR exp \*"etanercept"/ OR exp \*"adalimumab"/ OR exp \*"golimumab"/ OR exp \*"certolizumab pegol"/ OR exp \*"abatacept"/ OR exp \*"tocilizumab"/ OR exp \*"sarilumab"/ OR exp \*"ustekinumab"/ OR exp \*"secukinumab"/ OR exp \*"ixekizumab"/ OR exp \*"canakinumab"/ OR exp \*"interleukin 1 receptor antagonist protein"/ OR exp \*"riloncept"/ OR exp \*"rituximab"/ OR exp \*"belimumab"/ OR exp \*"guselkumab"/ OR exp \*"Antirheumatic Agent"/ OR "abatacept".ti,ab OR "adalimumab".ti,ab OR "adrenal cortex hormone".ti,ab OR "adrenal cortex hormones".ti,ab OR "anakinra".ti,ab OR "baricitinib".ti,ab OR "belimumab".ti,ab OR "biologic DMARD".ti,ab OR "biologic DMARDs".ti,ab OR "biological DMARD".ti,ab OR "biological DMARDs".ti,ab OR "canakinumab".ti,ab OR "certolizumab".ti,ab OR "corticosteroid".ti,ab OR "corticosteroids".ti,ab OR "cortisone".ti,ab OR "cyclophosphamide".ti,ab OR "disease modifying anti-rheumatic".ti,ab OR "disease modifying anti-rheumatic drugs".ti,ab OR "DMARD".ti,ab OR "DMARDs".ti,ab OR "etanercept".ti,ab OR "glucocorticoid".ti,ab OR "glucocorticoids".ti,ab OR "glucocorticosteroid".ti,ab OR "glucocorticosteroids".ti,ab OR "golimumab".ti,ab OR "guselkumab".ti,ab OR "infliximab".ti,ab OR "interleukin 1 receptor antagonist".ti,ab OR "interleukin 1 receptor antagonists".ti,ab OR "ixekizumab".ti,ab OR "JAK-inhibitor".ti,ab OR "JAK-inhibitors".ti,ab OR "janus kinase inhibitor".ti,ab OR "janus kinase inhibitors".ti,ab OR "leflunomide".ti,ab OR "methotrexate".ti,ab OR "methylprednisolone".ti,ab OR "mycophenolate".ti,ab OR "prednisolone".ti,ab OR "prednisone".ti,ab OR "riloncept".ti,ab OR "rituximab".ti,ab OR "sarilumab".ti,ab OR "secukinumab".ti,ab OR "steroid".ti,ab OR "steroids".ti,ab OR "sulfasalazine".ti,ab OR "tocilizumab".ti,ab OR "tofacitinib".ti,ab OR "ustekinumab".ti,ab OR "immunosuppres\*".ti,ab OR "immuno suppres\*".ti,ab OR "immune suppres\*".ti,ab OR exp \*"Immunosuppressive Agent"/ OR exp \*"Immunosuppression"/ OR exp \*"tofacitinib"/ OR "tofacitinib".ti,ab OR exp \*"baricitinib"/ OR "baricitinib".ti,ab OR exp \*"upadacitinib"/ OR "upadacitinib".ti,ab OR "upadacitinib"/ OR "upadacitinib".ti,ab OR "Rinvoq".ti,ab) AND (exp \*"mass screening"/ OR \*"screening"/ OR exp \*"tuberculin test"/ OR exp \*"interferon gamma release assay"/ OR exp \*"thorax radiography"/ OR exp \*"enzyme linked immunospot assay"/ OR exp \*"hepatitis b surface antigen"/ OR "anti-HBc".ti,ab OR "anti-HBV".ti,ab OR "anti-HCV".ti,ab OR "anti-HIV".ti,ab OR "antiHBc".ti,ab OR "antiHBV".ti,ab OR "antiHCV".ti,ab OR "antiHIV".ti,ab OR "chest-X-ray".ti,ab OR "elispot".ti,ab OR "HBsAg".ti,ab OR "HBV-DNA".ti,ab OR "IGRA".ti,ab OR "Mantoux".ti,ab OR "quantiferon".ti,ab OR "screening".ti,ab OR "tuberculin skin test".ti,ab OR "tuberculin skin tests".ti,ab OR "HBc".ti,ab OR "HBV".ti,ab OR "HCV".ti,ab OR "HIV".ti,ab OR "T Spot".ti,ab OR "varicella serology".ti,ab OR "anti-VZV".ti,ab OR "VZV".ti,ab OR "varicella zoster virus".ti,ab OR "chicken pox".ti,ab OR "shingles".ti,ab OR "anti-VZV".ti,ab OR exp \*"chickenpox"/ OR "chickenpox".ti,ab OR "chicken pox".ti,ab OR "HBc".ti,ab OR "HBV".ti,ab OR "HCV".ti,ab OR exp \*"hiv"/ OR "hiv".ti,ab OR exp \*"herpes zoster"/ OR "herpes zoster".ti,ab OR "shingles".ti,ab OR "shingle".ti,ab OR exp \*"herpesvirus 3, human"/ OR "human herpesvirus 3".ti,ab OR "varicella zoster virus".ti,ab OR "T Spot".ti,ab OR "TSpot".ti,ab OR exp \*"Mycobacterium tuberculosis test kit"/ OR "varicella".ti,ab OR exp \*"prevention and control"/ OR exp \*"Primary Prevention"/ OR exp \*"Secondary Prevention"/ OR exp \*"Tertiary

Prevention"/ OR exp \*"Prophylaxis"/ OR exp \*"rifampin"/ OR exp \*"rifapentine"/ OR  
 "itraconazole"/ OR exp \*"fluconazole"/ OR exp \*"azithromycin"/ OR exp \*"clarithromycin"/ OR  
 exp \*"herpes zoster immunoglobulin"/ OR exp \*"entecavir"/ OR exp \*"tenofovir"/ OR exp  
 \*"lamivudine"/ OR exp \*"acyclovir"/ OR exp \*"pentamidine"/ OR exp \*"valganciclovir"/ OR  
 "acyclovir".ti,ab OR "Azithromycin".ti,ab OR "chemoprophylaxis".ti,ab OR  
 "chemoprophyl\* ".ti,ab OR "Clarithromycin".ti,ab OR "entecavir".ti,ab OR "fluconazole".ti,ab  
 OR "isoniazide".ti,ab OR "Itraconazole".ti,ab OR "lamivudine".ti,ab OR "pentamidine".ti,ab OR  
 "prevent\* ".ti,ab OR "prophylaxis".ti,ab OR "prophyla\* ".ti,ab OR "rifampicin".ti,ab OR  
 "rifampin".ti,ab OR "rifapentine".ti,ab OR "sulfomethoxazole".ti,ab OR "tenofovir".ti,ab OR  
 "trimethoprim".ti,ab OR "valganciclovir".ti,ab OR "Varicella-zoster immune globulin\* ".ti,ab OR  
 "septrim".ti,ab OR "co trimoxazole".ti,ab OR exp \*"valacyclovir"/ OR "valacyclovir".ti,ab OR  
 "valaciclovir".ti,ab OR \*"cotrimoxazole"/ OR \*"Trimethoprim, Sulfamethoxazole Drug  
 Combination"/ OR "Centrin".ti,ab OR "Cotrimoxazole".ti,ab OR "Eslectin".ti,ab OR  
 "Insozalin".ti,ab OR "TMP-SMX".ti,ab OR "Trimethoprim Sulfamethoxazole".ti,ab OR  
 "Sulfamethoxazole Trimethoprim".ti,ab OR "Trimezole".ti,ab OR "Co Trimoxazole".ti,ab OR  
 "TMP SMX".ti,ab OR "Centran".ti,ab OR "Trimedim".ti,ab OR "Septrin".ti,ab OR  
 "Trimethoprim-sulfa".ti,ab OR "Bactifor".ti,ab OR "Sumetrolim".ti,ab OR "Abactrim".ti,ab OR  
 "Bactrim".ti,ab OR "Biseptol".ti,ab OR "Biseptol 480".ti,ab OR "Biseptol480".ti,ab OR  
 "Drylin".ti,ab OR "Eusaprim".ti,ab OR "Kepinol".ti,ab OR "Kepinol Forte".ti,ab OR "Lescot".ti,ab  
 OR "Metomide".ti,ab OR "Oripim".ti,ab OR "Septra".ti,ab OR "Sulprim".ti,ab OR  
 "Trimosulfa".ti,ab OR \*"Valacyclovir"/ OR "Valacyclovir".ti,ab OR "Valaciclovir".ti,ab)) AND  
 english.la NOT (("Case Report"/ OR "case report".ti) NOT (exp "Review"/ OR "review".ti OR  
 "Clinical Study"/ OR exp "Clinical Trial"/ OR "trial".ti OR "RCT".ti)) NOT (exp "Animals"/ NOT exp  
 "Humans"/)

### Cochrane Library

<https://www.cochranelibrary.com/advanced-search/search-manager>

(("Infection" OR "Bacterium" OR "Virus" OR "Parasite" OR "Fungus" OR "infection" OR  
 "infections" OR "Tuberculosis" OR "hepatitis B" OR "hepatitis C" OR "Human immunodeficiency  
 virus" OR "herpes zoster" OR "varicella zoster" OR "HZV" OR "VZV" OR "pneumocystis carinii"  
 OR "pneumocystis jiroveci" OR "PCP" OR "human papilloma virus" OR "HPV" OR "opportunistic  
 infections" OR "chronic infections" OR "Leishmaniasis" OR "strongyloidiasis" OR "strongyloides"  
 OR "histoplasmosis" OR "histoplasma" OR "toxoplasmosis" OR "toxoplasma" OR "trypanosoma  
 cruzi" OR "trypanosomiasis" OR "CMV" OR "Cytomegalovirus" OR "Epstein Barr virus" OR "EBV"  
 OR "non tuberculous mycobacteria" OR "west nile virus" OR "cryptosporidiosis" OR  
 "nocardiosis" OR "nocardia" OR "actinomycosis" OR "actinomyces" OR "Bartonellosis" OR  
 "bartonella" OR "campylobacter" OR "legionellosis" OR "leptospirosis" OR "leptospira" OR  
 "listeriosis" OR "listeria" OR "salmonellosis" OR "salmonella" OR "shigellosis" OR "shigella" OR  
 "syphilis" OR "aspergillosis" OR "Coccidioidomycosis" OR "candidiasis" OR "candida" OR  
 "molds" OR "leprosy" OR "Isosporiasis" OR "isospora" OR "bacteria" OR "viruses" OR "fungi" OR

"parasites" OR "mycoses" OR "bacterium" OR "virus" OR "fungus" OR "parasite" OR "mycosis" OR "hepatitis E" OR "chicken pox" OR "shingles" OR "Chagas" OR "legionella" OR "treponema" OR "aspergillus" OR "mycobacterium" OR "mycobacteria" OR "JC virus" OR "ancylostoma" OR "ancylostoma" OR "ancylostomas" OR "ancylostomiasis" OR "ancylostomiasis" OR "ancylostomiasis" OR "ascariasis" OR "ascariasis" OR "ascaris" OR "ascaris" OR "ascari" OR "chlamydia" OR "chlamydia" OR "chlamydiae" OR "chlamydias" OR "coccidioidal" OR "coccidioides" OR "coccidioides" OR "cryptococcosis" OR "cryptococcosis" OR "cryptococcoses" OR "cryptococcus" OR "cryptococcus" OR "cryptosporidium" OR "cryptosporidium" OR "cyclospora" OR "cyclospora" OR "cyclosporiasis" OR "cyclosporiasis" OR "echinococcosis" OR "echinococcosis" OR "echinococcoses" OR "echinococcus" OR "echinococcus" OR "endamoeba" OR "entamoeba" OR "entamoeba" OR "entameba" OR "entamoebas" OR "entamoebae" OR "enterobiasis" OR "enterobiasis" OR "enterobius" OR "enterobius" OR "enterobius vermicularis" OR "fasciola" OR "fasciola" OR "fascioliasis" OR "fascioliasis" OR "filariasis" OR "filariasis" OR "filariases" OR "Giardia lamblia" OR "Giardia lamblia" OR "neisseria gonorrhoeae" OR "neisseria gonorrhoeae" OR "gonococcus" OR "haemophilus influenzae" OR "haemophilus influenzae" OR "haemophilus influenzae" OR "hemophilus influenzae" OR "herpes simplex" OR "herpes simplex" OR "herpesvirus 8, human" OR "Human herpesvirus 8" OR "human herpesvirus 8" OR "hhv8" OR "hiv" OR "hiv" OR "ancylostomatoidea" OR "ancylostomatoidea" OR "hookworm" OR "hookworms" OR "HSV" OR "human t lymphotropic virus 1" OR "human t lymphotropic virus 1" OR "htlv 1" OR "deltaretrovirus" OR "deltaretrovirus" OR "human t lymphotropic virus" OR "influenza, human" OR "Influenza virus" OR "influenza" OR "human influenza" OR "influenza" OR "influenzae" OR "influenzas" OR "giardiasis" OR "giardiasis" OR "lambliasis" OR "leishmania" OR "leishmania" OR "leishmanias" OR "leishmaniae" OR "loa" OR "loa" OR "loa loa" OR "mucormycosis" OR "mucormycosis" OR "mucormycoses" OR "neisseria" OR "neisseria" OR "neisseriae" OR "neisserias" OR "nontuberculous mycobacteria" OR "nontuberculous mycobacteria" OR "non tuberculous mycobacteria" OR "onchocerca" OR "onchocerca" OR "onchocerciasis" OR "onchocerciasis" OR "onchocerciasis" OR "paracoccidioides" OR "paracoccidioides" OR "paragonimiasis" OR "paragonimiasis" OR "paragonimiasis" OR "paragonimus" OR "paragonimus" OR "parvovirus b19, human" OR "Human parvovirus B19" OR "human parvovirus b19" OR "parvovirus b19" OR "streptococcus pneumoniae" OR "streptococcus pneumoniae" OR "pneumococcus" OR "schistosoma" OR "schistosoma" OR "schistosomas" OR "schistosomiasis" OR "schistosomiasis" OR "schistosomiasis" OR "strongyloidiasis" OR "strongyloidiasis" OR "strongyloidosis" OR "taenia" OR "taenia" OR "taenias" OR "tenia" OR "teniae" OR "taeniasis" OR "taeniasis" OR "taeniasis" OR "taeniasis" OR "talaromyces" OR "talaromyces" OR "talaromyce" OR "talaromyces" OR "talaromyces" OR "toxocara" OR "toxocara" OR "toxocarar" OR "toxocariasis" OR "toxocariasis" OR "toxocariases" OR "trichinella spiralis" OR "trichinella spiralis" OR "trichinellosis" OR "trichinellosis" OR "trichinelloses" OR "trichuris" OR "trichuris" OR "trichuri" OR "trypanosoma" OR "trypanosoma" OR "trypanosomas" OR "trichuris" OR "trichuris" OR "whipworm" OR "trichuriasis" OR "trichuriasis" OR "whipworms" OR "wuchereria bancrofti" OR "wuchereria bancrofti"):ti,ab,kw AND ("rheumatology" OR "rheumatic disease" OR "musculoskeletal disease" OR "systemic lupus erythematosus" OR "antiphospholipid syndrome" OR "sjoegren syndrome" OR "rheumatoid arthritis" OR "psoriatic arthritis" OR "spondylarthropathy" OR "behcet disease" OR "vasculitis" OR "takayasu arteritis" OR "giant cell arteritis" OR "polyarteritis nodosa" OR "systemic sclerosis"

OR "dermatomyositis" OR "immunoglobulin g4 related disease" OR "relapsing polychondritis" OR "familial mediterranean fever" OR "juvenile arthritis" OR "ANCA vasculitis" OR "antiphospholipid syndrome" OR "anti phospholipid syndrome" OR "arthritic" OR "arthritis" OR "Autoimmune rheumatic disease" OR "Autoimmune rheumatic diseases" OR "autoinflammatory disease" OR "autoinflammatory diseases" OR "behcet syndrome" OR "Behcet's disease" OR "cryoglobulinemic vasculitis" OR "dermatomyositis" OR "familial Mediterranean fever" OR "giant cell arteritis" OR "IgG4 related disease" OR "immunoglobulin g4 related disease" OR "inflammatory myopathy" OR "lupus" OR "musculoskeletal disease" OR "musculoskeletal diseases" OR "polyarteritis nodosa" OR "psoriatic arthritis" OR "relapsing polychondritis" OR "relapsing polychondritis" OR "rheumatic disease" OR "rheumatic diseases" OR "Rheumatic musculoskeletal disease" OR "Rheumatic musculoskeletal diseases" OR "rheumatica polymyalgia" OR "rheumatoid" OR "rheumatoid arthritis" OR "Rheumatology" OR "seronegative spondyloarthropathies" OR "seronegative spondyloarthropathy" OR "sjogren syndrome" OR "Sjogren's syndrome" OR "sjogrens syndrome" OR "spondylarthropathies" OR "spondylarthropathy" OR "still's disease" OR "stills disease" OR "Systemic lupus erythematosus" OR "systemic lupus" OR "SLE" OR "systemic scleroderma" OR "systemic sclerosis" OR "Takayasu arteritis" OR "vasculitis" OR "ankylosing spondylitis" OR "cutaneous limited sclerosis" OR "cutaneous sclerosis" OR "inflammatory myopathy" OR "limited scleroderma" OR "limited sclerosis" OR "Myositis" OR "Myositis" OR "Dermatomyositis" OR "Pyomyositis" OR "Scleroderma" OR "Scleroderma, Systemic" OR "Scleroderma" OR "Systemic Sclerosis"):ti AND ("steroid" OR "corticosteroid" OR "glucocorticoid" OR "prednisolone" OR "prednisone" OR "methylprednisolone" OR "cortisone" OR "methotrexate" OR "leflunomide" OR "sulfasalazine" OR "cyclophosphamide" OR "tofacitinib" OR "baricitinib" OR "janus kinase inhibitor" OR "infliximab" OR "etanercept" OR "adalimumab" OR "golimumab" OR "certolizumab pegol" OR "abatacept" OR "tocilizumab" OR "sarilumab" OR "ustekinumab" OR "secukinumab" OR "ixekizumab" OR "canakinumab" OR "interleukin 1 receptor antagonist protein" OR "rilonacept" OR "rituximab" OR "belimumab" OR "guselkumab" OR "Antirheumatic Agent" OR "abatacept" OR "adalimumab" OR "adrenal cortex hormone" OR "adrenal cortex hormones" OR "anakinra" OR "baricitinib" OR "belimumab" OR "biologic DMARD" OR "biologic DMARDs" OR "biological DMARD" OR "biological DMARDs" OR "canakinumab" OR "certolizumab" OR "corticosteroid" OR "corticosteroids" OR "cortisone" OR "cyclophosphamide" OR "disease modifying anti rheumatic" OR "disease modifying anti rheumatic drugs" OR "DMARD" OR "DMARDs" OR "etanercept" OR "glucocorticoid" OR "glucocorticoids" OR "glucocorticosteroid" OR "glucocorticosteroids" OR "golimumab" OR "guselkumab" OR "infliximab" OR "interleukin 1 receptor antagonist" OR "interleukin 1 receptor antagonists" OR "ixekizumab" OR "JAK inhibitor" OR "JAK inhibitors" OR "janus kinase inhibitor" OR "janus kinase inhibitors" OR "leflunomide" OR "methotrexate" OR "methylprednisolone" OR "mycophenolate" OR "prednisolone" OR "prednisone" OR "rilonacept" OR "rituximab" OR "sarilumab" OR "secukinumab" OR "steroid" OR "steroids" OR "sulfasalazine" OR "tocilizumab" OR "tofacitinib" OR "ustekinumab" OR "immunosuppres\*" OR "immuno suppres\*" OR "immune suppres\*" OR "Immunosuppressive Agent" OR "Immunosuppression" OR "tofacitinib" OR "tofacitinib" OR "baricitinib" OR "baricitinib" OR "upadacitinib" OR "upadacitinib" OR "upadacitinib" OR "upadacitinib" OR "Rinvoq"):ti,ab,kw AND ("mass screening" OR "screening" OR "tuberculin test" OR "interferon gamma release assay" OR "thorax radiography" OR "enzyme linked

immunospot assay" OR "hepatitis b surface antigen" OR "anti Hbc" OR "anti HBV" OR "anti HCV" OR "anti HIV" OR "antiHbc" OR "antiHBV" OR "antiHCV" OR "antiHIV" OR "chest X ray" OR "elispot" OR "HBsAg" OR "HBV DNA" OR "IGRA" OR "Mantoux" OR "quantiferon" OR "screening" OR "tuberculin skin test" OR "tuberculin skin tests" OR "Hbc" OR "HBV" OR "HCV" OR "HIV" OR "T Spot" OR "varicella serology" OR "anti VZV" OR "VZV" OR "varicella zoster virus" OR "chicken pox" OR "shingles" OR "anti VZV" OR "chickenpox" OR "chickenpox" OR "chicken pox" OR "Hbc" OR "HBV" OR "HCV" OR "hiv" OR "hiv" OR "herpes zoster" OR "herpes zoster" OR "shingles" OR "shingle" OR "herpesvirus 3, human" OR "human herpesvirus 3" OR "varicella zoster virus" OR "T Spot" OR "TSpot" OR "Mycobacterium tuberculosis test kit" OR "varicella" OR "prevention and control" OR "Primary Prevention" OR "Secondary Prevention" OR "Tertiary Prevention" OR "Prophylaxis" OR "rifampin" OR "rifapentine" OR "itraconazole" OR "fluconazole" OR "azithromycin" OR "clarithromycin" OR "herpes zoster immunoglobulin" OR "entecavir" OR "tenofovir" OR "lamivudine" OR "acyclovir" OR "pentamidine" OR "valganciclovir" OR "acyclovir" OR "Azithromycin" OR "chemoprophylaxis" OR "chemoprophyl\*" OR "Clarithromycin" OR "entecavir" OR "fluconazole" OR "isoniazide" OR "Itraconazole" OR "lamivudine" OR "pentamidine" OR "prevent\*" OR "prophylaxis" OR "prophyla\*" OR "rifampicin" OR "rifampin" OR "rifapentine" OR "sulfomethoxazole" OR "tenofovir" OR "trimethoprim" OR "valganciclovir" OR "Varicella zoster immune globulin\*" OR "septrim" OR "co trimoxazole" OR "valacyclovir" OR "valacyclovir" OR "valaciclovir" OR "cotrimoxazole" OR "Trimethoprim, Sulfamethoxazole Drug Combination" OR "Centrin" OR "Cotrimoxazole" OR "Eslectin" OR "Insozalin" OR "TMP SMX" OR "Trimethoprim Sulfamethoxazole" OR "Sulfamethoxazole Trimethoprim" OR "Trimezole" OR "Co Trimoxazole" OR "TMP SMX" OR "Centran" OR "Trimedin" OR "Septrin" OR "Trimethoprimsulfa" OR "Bactifor" OR "Sumetrolim" OR "Abactrim" OR "Bactrim" OR "Biseptol" OR "Biseptol 480" OR "Biseptol480" OR "Drylin" OR "Eusaprim" OR "Kepinol" OR "Kepinol Forte" OR "Lescot" OR "Metomide" OR "Oripim" OR "Septra" OR "Sulprim" OR "Trimosulfa" OR "Valacyclovir" OR "Valacyclovir" OR "Valaciclovir"):ti,ab,kw)

## 2. Supplementary Figure-1: Flow chart of the systematic literature review

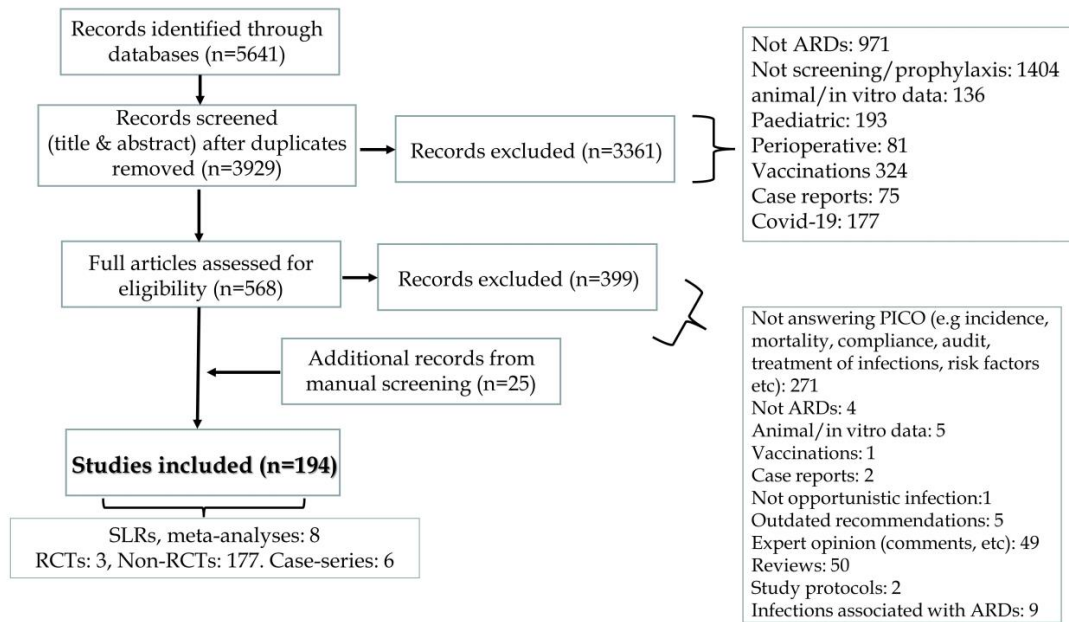

**3. Supplementary tables for Tuberculosis:** The following tables present data about the conversion rate of tuberculin skin test and Interferon gamma release assay, after treatment with biologic disease modifying drugs, and also the various schemes used for latent TB reactivation, depending on the tuberculosis geographical burden

**Supplementary Table 1:** Conversion of TST or IGRA in AIIRD patients treated with bDMARDs

| Author-date/Country     | Patients (N) | Disease | Treatment  | Conversion rate                      | Time                     | RoB |
|-------------------------|--------------|---------|------------|--------------------------------------|--------------------------|-----|
| <b>TST</b>              |              |         |            |                                      |                          |     |
| Hatzara 2014/Greece     | 70           | AIIRD   | TNFi       | 13%                                  | 12 months                | 8   |
| Hejazi 2020/Iran        | 50           | AIIRD   | TNFi       | 2%                                   | 16 weeks                 | 6   |
| Thomas 2020/Greece      | 50           | AIIRD   | bDMARDs    | 22%                                  | 1.4 years and 6.9 years* | 6   |
| Cerda 2018/Argentina    | 85           | IA      | bDMARDs    | 9.4%                                 | 2-22 months              | 6   |
| Cuomo 2017/Italy        | 249          | RA      | bDMARDs    | 13.6% <sup>#</sup>                   | 24 months (median)       | 6   |
| Park 2009/South Korea   | 86           | AIIRD   | TNFi       | 32.6%                                | 12 months                | 6   |
| Perez 2016/Spain        | 140          | AIIRD   | TNFi       | 4.3%                                 | 4.9 years (mean)         | 5   |
| Chen 2008/Taiwan        | 43           | RA      | Adalimumab | 37%                                  | 12 months                | 5   |
| Bonfiglioli 2014/Brazil | 202          | RA      | TNFi       | 9.8%                                 | NS                       | 5   |
| Xie 2011/China          | 58           | AIIRD   | Infliximab | 13.7%                                | 12 months                | 4   |
| <b>IGRA</b>             |              |         |            |                                      |                          |     |
| Hatzara 2014/Greece     | 70           | AIIRD   | TNFi       | 10% <sup>^</sup> and 5% <sup>§</sup> | 12 months                | 8   |
| He 2013/China           | 101          | AIIRD   | TNFi       | 11.2%                                | 6 months                 | 8   |
| Kim 2019/South Korea    | 119          | IA      | TNFi       | 11.8%                                | 25.9 months              | 7   |
| Goel 2020/USA           | 115          | RA      | TNFi       | 9.6%                                 | 12 months                | 6   |
| Thomas 2020/Greece      | 50           | AIIRD   | bDMARDs    | 4.8%                                 | 1.4 years and 6.9 years* | 6   |
| Cuomo 2017/Italy        | 249          | RA      | bDMARDs    | 13.6% <sup>#</sup>                   | 24 months (median)       | 6   |
| Son 2014/South Korea    | 127          | AS      | TNFi       | 7.9%                                 | 22.6 months (median)     | 6   |
| Park 2009/South Korea   | 86           | AIIRD   | TNFi       | 14.1%                                | 21.5 months (median)     | 6   |
| Scrivo 2012/Italy       | 102          | AIIRD   | TNFi       | 13.6%                                | 12 months                | 5   |

AIIRD: autoimmune inflammatory rheumatic diseases, AS: ankylosing spondylitis, bDMARDs: biologic DMARDs, IA: inflammatory arthritis, IGRA: interferon gamma release assay, N: number, RA: rheumatoid arthritis, RoB: risk of bias assessed by Newcastle-Ottawa scale (score 0-9), TNFi: TNF inhibitors, TST: tuberculin skin test  
\* two re-screenings, # converted TST and/or IGRA, ^ T-Spot, § quantiferon



**Supplementary Table 2: Tuberculosis prophylaxis schemes in low-burden countries\***

| Author date/Country     | Patients (N) | Disease | Treatment   | Prophylaxis | TB reactivation rates | RoB |
|-------------------------|--------------|---------|-------------|-------------|-----------------------|-----|
| Carmona 2005/Spain      | 324          | AIIRD   | TNFi        | INH9        | 34 (0.6%)**           | 9   |
| Winthrop 2015/USA       | 286          | RA      | Tofacitinib | INH9        | 0 (0%)                | 8   |
| Reino 2007/Spain        | 950          | IA      | TNFi        | INH9        | 1 (0.11%)             | 8   |
| Watanabe 2016/Japan     | 22           | RA      | Adalimumab  | INH6-9      | 0 (0%)                | 7   |
| Aggarwal 2009/USA       | 78           | AIIRD   | Etanercept  | INH9        | 0 (0%)                | 7   |
| Kurt 2013/Turkey        | 58           | AIIRD   | TNFi        | INH9        | 0 (0%)                | 6   |
| Hsia 2013/mixed         | 317          | IA      | Golimumab   | INH6        | 0 (0%)                | 6   |
| Bray 2006 France        | 93           | IA      | TNFi        | RH3         | 0 (0%)                | 6   |
| Sichletidis 2006/Greece | 36           | AIIRD   | TNFi        | INH6 or RH3 | 7 (19.4%)             | 5   |
| Valls 2015/Spain        | 69           | IA      | TNFi        | RH3         | 0 (0%)                | 4   |

AIIRD: autoimmune inflammatory rheumatic diseases, IA: Inflammatory arthritis, INH6-9: isoniazid for 6 to 9 months, RA: Rheumatoid arthritis, RH3: rifampicin, isoniazid for 3 months, RoB: risk of bias assessed by Newcastle-Ottawa scale (score 0-9), TB: tuberculosis, TNFi: TNF-inhibitors

\* based on World Health Organization classification (please see main SLR manuscript) \*\* Comparing pre and post publication of national recommendations for management of latent TB, active TB rates decreased by 78% (incidence risk ratio 0.22, 95% CI [0.03–0.88] P=0.008)

**Supplementary Table 3: Tuberculosis prophylaxis schemes in medium/high-burden countries\***

| Author-date/Country     | Patients (N)         | Disease | Treatment        | Prophylaxis                | TB reactivation rates N (%) | RoB |
|-------------------------|----------------------|---------|------------------|----------------------------|-----------------------------|-----|
| Malaviya 2018/India     | 267                  | IA      | bDMARDs          | INH6 or RH4                | 5 (1.9%)                    | 7   |
| Shobha 2018/India       | 21                   | AIIRDs  | bDMARDs          | RIF6 (n=14), INH6-9 (n=7)  | 0 (0.0%)                    | 7   |
| Shin 2021/South Korea   | 9474                 | RA      | bDMARDs          | INH9/RIF4/RH3              | 18/2249 (0.8%)**            | 6   |
| Chen 2018/Taiwan        | 21 (3HP) and 23 INH9 | RA      | b- or ts- DMARDs | 3HP vs INH9                | 0 (0.0%)                    | 6   |
| Gaitonde 2002/India     | 97                   | SLE     | GC               | INH12                      | 2/95 (2.1%)                 | 6   |
| Bonfiglioli 2014/Brazil | 66                   | RA      | TNFi             | INH6                       | 0 (0.0%)                    | 5   |
| Song 2021/South Korea   | 187                  | RA      | b- or ts- DMARDs | INH9                       | 0 (0.0%)                    | 5   |
| Shen 2018/China         | 12                   | BD      | TNFi             | INH 6-9 or RIF3-4 or RH3-4 | 1 (8.3%)^                   | 4   |

AIIRD: autoimmune inflammatory rheumatic diseases, bDMARDs: biologic DMARDs, GC: glucocorticoids, N: number, RA: rheumatoid arthritis, RoB: risk of bias assessed by Newcastle-Ottawa scale (score 0-9), IA: Inflammatory arthritis, INH6-9: isoniazid for 6 to 9 months, N: number, RIF 3-4: rifampicin for 3-4 months, SLE: systemic lupus erythematosus, TB: tuberculosis, TNFi: TNF-inhibitors, tsDMARDs: targeted synthetic DMARDs, 3HP: rifapentin, isoniazid for 3 months

\* based on World Health Organization classification (please see manuscript) \*\* In this study, 100/7225 were not on prophylaxis: 1.38% (reactivation rate); HR: 0.52 (0.32, 0.86), in favor of those being on prophylaxis, ^ this patient refused to receive prophylaxis

**4. Supplementary table for hepatitis B:** the following table present the existing data for HBV-reactivation in HBsAg-positive patients with AIIRD treated with various immunosuppressives/immunomodulators, in relation to administration of anti-viral prophylaxis.

**Supplementary Table 4:** Antiviral prophylaxis and HBV reactivation in HBsAg-positive patients.

| Author-date/Country      | Patients (N)      | Disease      | Treatment                         | Prophylaxis N (%)                 | Reactivation N (%)                                                                | RoB            |
|--------------------------|-------------------|--------------|-----------------------------------|-----------------------------------|-----------------------------------------------------------------------------------|----------------|
| Su 2018/NA <sup>†</sup>  | 2162*             | AIIRD        | anti-rheumatic drugs <sup>#</sup> | Yes: 111 (30.5)<br>No: 253 (69.5) | RR: 0.51 (95% CI 0.26 - 0.98)<br>RD: - 0.16 (95% CI -0.26 to - 0.06)              | Medium quality |
| Lin 2016/NA <sup>†</sup> | 87**              | IA           | csDMARDs                          | Yes: 29 (33.3)<br>No: 58 (66.7)   | Pooled Rate, % (95CI): 27.1 (12.4-44.8)<br>Pooled rate, % (95CI): 22.4 (8.1-40.8) | High quality   |
| Mo 2015/China            | 36                | RA           | anti-rheumatic drugs <sup>#</sup> | Yes: 18 (50.0)<br>No: 18 (50.0)   | 7 (38.9) <sup>v</sup><br>6 (33.3)                                                 | 8              |
| Matsuzaki 2017/Japan     | 20 <sup>^ c</sup> | RA           | anti-rheumatic drugs <sup>#</sup> | 0 (0)                             | 4 (20.0)                                                                          | 7              |
| Tan 2012/China           | 27                | RA           | csDMARDs                          | 0 (0)                             | 2/23 (8.7)                                                                        | 7              |
| Chen 2017/Taiwan         | 123               | RA           | anti-rheumatic drugs <sup>#</sup> | 0 (0)                             | 30 (24.4)                                                                         | 6              |
| Kalyoncu 2015/Turkey     | 76 <sup>^</sup>   | IA           | anti-rheumatic drugs <sup>#</sup> | Yes: 41 (54.0)<br>No: 33 (43.4)   | 5 (12.2)<br>8 (24.2)                                                              | 6              |
| Chen 2021/Taiwan         | 55                | SLE          | Immunosuppressants                | 0 (0)                             | 30 (54.5)                                                                         | 6              |
| Jeong 2021/Taiwan        | 141               | RA           | anti-rheumatic drugs <sup>#</sup> | 0 (0)                             | 24 (17.0)                                                                         | 5              |
| Kalyoncu 2009/Turkey     | 11                | AIIRD        | anti-rheumatic drugs <sup>#</sup> | 11 (100)                          | 0 (0)                                                                             | 5              |
| Lin 2017/Taiwan          | 38                | SLE          | Immunosuppressants                | Yes: 4 (10.5)<br>No: 34 (89.5)    | 0 (0)<br>8 (23)                                                                   | 5              |
| Yang 2007/Taiwan         | 98                | DM/Pemphigus | GC                                | 0 (0)                             | 4/98 (4.1)                                                                        | 4              |
| Xu 2015/China            | 17                | RA           | Leflunomide                       | ND                                | 5 (31.3)                                                                          | 3              |
| <b>bDMARDs</b>           |                   |              |                                   |                                   |                                                                                   |                |
| Lin 2016/NA <sup>†</sup> | 121               | IA           | TNFi                              | Yes: 57 (47.1)<br>No: 64 (52.9)   | Pooled Rate, % (95CI): 4.4 (0.4-11.7)<br>Pooled Rate, % (95CI): 15.6 (2.3-35.7)   | High quality   |
| Giardina 2013/Italy      | 4                 | IA           | TNFi                              | 4 (100)                           | 0 (0)                                                                             | 6              |
| Ye 2014/China            | 31 <sup>^ j</sup> | IA           | TNFi                              | Yes: 9 (29.0)<br>No: 22 (71.0)    | 0 (0)<br>6 (27.3)                                                                 | 4              |
| Zingarelli 2009/Italy    | 23 <sup>^</sup>   | AIIRD        | TNFi                              | Yes: 7 (30.4)                     | 1 (14.3)                                                                          | NA             |

|                           |                   |       |             |                |           |   |
|---------------------------|-------------------|-------|-------------|----------------|-----------|---|
|                           |                   |       |             | No: 16 (69.6)  | 12 (75.0) |   |
| Ryu 2012/Korea            | 49                | RA/AS | TNFi        | Yes: 20 (40.8) | 1 (5)     | 5 |
|                           |                   |       |             | No: 29 (59.2)  | 2 (6.9)   |   |
| Lan 2011/Taiwan           | 18                | RA    | TNFi        | Yes: 10 (55.6) | 0 (0)     | 8 |
|                           |                   |       |             | No: 8 (44.4)   | 5 (62.5)  |   |
| Vassilopoulos 2010/Greece | 14                | IMiD  | TNFi        | 14 (100)       | 1 (7.1)   | 7 |
| Lin 2019/Taiwan           | 11                | RA    | Tocilizumab | 11 (100)       | 0 (0)     | 6 |
|                           |                   |       |             | Yes: 2 (28.6)  | 0 (0)     |   |
| Chen 2017/China           | 7                 | RA    | Tocilizumab | No: 5 (71.4)   | 3 (60.0)  | 6 |
|                           |                   |       |             | Yes: 4 (57.1)  | 0 (0)     |   |
| Kuo 2020/Taiwan           | 7                 | RA    | Tocilizumab | No: 3 (42.9)   | 3 (100)   | 6 |
|                           |                   |       |             | Yes: 9 (19.2)  | 0 (0)     |   |
| Padovan 2016/Italy        | 47 <sup>^</sup> § | RA    | Abatacept   | No: 38 (80.9)  | 0 (0)     | 6 |
|                           |                   |       |             | Yes: 2 (33.3)  | 0 (0)     |   |
| Chen 2018/Taiwan          | 6                 | RA    | Tofacitinib | No: 4 (66.7)   | 2 (50.0)  | 6 |
|                           |                   |       |             | Yes: 2 (25.0)  | 0 (0)     |   |
| Wang 2021/Taiwan          | 8                 | RA    | Tofacitinib | No: 6 (75.0)   | 2 (33.3)  | 6 |

AIIRD: autoimmune inflammatory rheumatic diseases, AS: ankylosing spondylitis, bDMARDs: biologic DMARDs, CI: confidence intervals, csDMARDs: conventional synthetic DMARDs, GC: glucocorticoids, HBV: hepatitis B virus, IA: inflammatory arthritis, N: number, RA: rheumatoid arthritis, RD: rate

difference, RoB: risk of bias assessed by Newcastle-Ottawa scale (score 0-9) for all studies except from meta-analyses marked with this symbol (†) in which AMSTAR2 tool (quality score: critically low, low, moderate, high) was used, RR: rate ratio, SLE: systemic lupus erythematosus, TNFi: TNF-inhibitors  
† meta-analysis, \* 53 studies were included, # various types of anti-rheumatic drugs used \*\* 25 studies were included, ^ inactive carriers. § Four other patients were chronic carriers and received treatment with tenofovir and adefovir (2 each). They did not display any HBV reactivation. ¶ Four other patients were chronic carriers. Only those who did not receive prophylaxis (n=2) developed HBV reactivation, ^ None from the active carriers (n=22) developed reactivation (11 patients received prophylaxis)  
^5/7 had discontinued prophylaxis 1-7 months later

**5. Supplementary table for *Pneumocystis jirovecii*:** the following tables present the various dosage schemes of trimethoprim-sulfamethoxazole (TMP/SMX) that have been used as a prophylaxis for *pneumocystis jirovecii* as well as outcomes when regimes other than TMP/SMX are given for prophylaxis against this infectious agent.

**Supplementary Table 5:** Various dosage schemes of trimethoprim-sulfamethoxazole, as prophylaxis for PCP

| Author-date/Country                | Patients (N) | Disease | Treatment                        | Prophylaxis with TMP/SMX                                                | Results                                                                                                          | RoB           |
|------------------------------------|--------------|---------|----------------------------------|-------------------------------------------------------------------------|------------------------------------------------------------------------------------------------------------------|---------------|
| Utsunomiya 2017/Japan <sup>†</sup> | 183          | AIIRD   | GC*                              | SS (n=58), HS (n=59), ES (n=55)                                         | PCP 0% for all groups at week 24<br>AE: HS and ES lower DC due to AEs, Vs SS                                     | High          |
| Utsunomiya 2020/Japan <sup>†</sup> | 172          | AIIRD   | GC*                              | SS (n=58), HS (n=59), ES (n=55)                                         | PCP 0% for all groups at week 52<br>AE: lower in HS (19.1%, p<0.007) and ES (20.3%, p<0.007) than in SS (41.8%). | Some concerns |
| Harada 2021/Japan                  | 220          | AIIRD   | antirheumatic drugs <sup>#</sup> | SS or 960/thrice weekly (n=145) Vs dose-reduction (n=75) <sup>^</sup> . | PCP 0% for all groups<br>SS more AEs (p=0.017)                                                                   | 8             |
| Takenaka 2013/Japan                | 44           | AIIRD   | antirheumatic drugs <sup>#</sup> | Routine group (n=28) Vs. Escalation group (n=13)                        | Escalation group: higher retention (100% Vs 71.4 %, p=0.032)                                                     | 6             |
| Suyama 2016/Japan                  | 59           | SLE     | Immunosuppressants               | SS (n=31) Vs graded administration (n=28)                               | Graded administration had less AE (p=0.009)                                                                      | 5             |

AIIRD: autoimmune inflammatory rheumatic diseases, AE: adverse events, ES: escalated strength, HS: half strength, N: number, PCP: Pneumocystis Pneumonia, RoB: risk of bias assessed by Newcastle-Ottawa scale (score 0-9) for all studies except RCTs in which Cochrane risk of bias tool (score for risk of bias: low, high, some concerns) was used, SLE: systemic lupus erythematosus, SS: single strength: 480mg/daily, TMP/SMX: trimethoprim-sulfamethoxazole, Vs: versus

<sup>†</sup> randomized controlled trial (RCT), \* prednisolone>0.6mg/kg, # various types of anti-rheumatic drugs used, <sup>^</sup>dose reduction: 480 every-other day or thrice weekly

**Supplementary Table 6:** Alternative regimes (other than trimethoprim-sulfamethoxazole) as prophylaxis for PCP

| Author-date/Country | Patients (N) | Disease                   | Treatment                         | Intervention                                                                                                                                                                                      | Outcome <sup>§</sup>                                                                                                                                                      | RoB |
|---------------------|--------------|---------------------------|-----------------------------------|---------------------------------------------------------------------------------------------------------------------------------------------------------------------------------------------------|---------------------------------------------------------------------------------------------------------------------------------------------------------------------------|-----|
| Kitazawa 2019/Japan | 96           | AIIRD                     | GC*                               | <ul style="list-style-type: none"> <li>• TMP/SMX 480mg/day (n=55)<sup>^</sup></li> <li>• Pentamidine 300mg/month (n=28)<sup>^</sup></li> <li>• Atovaquone 1500mg/day (n=7)<sup>^</sup></li> </ul> | PCP: 0%<br>Treatment continuation (1 year) <ul style="list-style-type: none"> <li>• TMP/SMX: 55.3%,</li> <li>• pentamidine: 66.8%,</li> <li>• atovaquone: 100%</li> </ul> | 6   |
| Schmajuk 2019/USA   | 316          | Vasculitis, Myositis, SLE | anti-rheumatic drugs <sup>#</sup> | 39% received prophylaxis <ul style="list-style-type: none"> <li>• TMP/SMX (73%)</li> <li>• Dapsone (16%)</li> <li>• Atovaquone (10%)</li> <li>• Pentamidine (1%)</li> </ul>                       | PCP: 0%                                                                                                                                                                   | 8   |
| Jinno 2021/Japan    | 388          | AIIRD                     | GC**                              | <ul style="list-style-type: none"> <li>• TMP/SMX 480mg/day (n=281)</li> <li>• Atovaquone 1500mg/day (n=107)</li> </ul>                                                                            | Similar efficacy for PCP prevention (HR 0.97, 95% CI 0.19–5.09)                                                                                                           | 7   |
| Sonomoto 2021/Japan | 3787         | RA                        | anti-rheumatic drugs <sup>#</sup> | <ul style="list-style-type: none"> <li>• TMP/SMX (80–560 mg/week) (n=1520)</li> <li>• Pentamidine 300mg/visit (n=102)</li> <li>• Atovaquone 1500mg/day (n=3)</li> </ul>                           | TMP/SMX more effective Vs pentamidine (p<0.0001)                                                                                                                          | 5   |

AIIRD: autoimmune inflammatory rheumatic diseases, CI: confidence intervals, GC: glucocorticoids, HR: hazard ratio, N: number, PCP: Pneumocystis Pneumonia, RoB: risk of bias assessed by Newcastle-Ottawa scale (score 0-9), SLE: systemic lupus erythematosus, TMP/SMX: trimethoprim-sulfamethoxazole  
<sup>§</sup> efficiency in preventing PCP, \*dose not defined, \*\*prednisolone ≥20mg for ≥4 weeks, <sup>^</sup> final selection of agents in this study, <sup>#</sup> various types of anti-rheumatic drugs used
